# Supplementary material
Source: ML conference proceedings conference paper supplement (https://openaccess.thecvf.com/content/CVPR2026/html/Lei_Structural_Action_Transformer_CVPR_2026_paper.html)
Supplement: Supplementary file 1 [file appendix.pdf › supp/appendix.pdf]

# Structural Action Transformer for 3D Dexterous Manipulation

## Supplementary Material

### 1. Embodied Joint Codebook Mapping Table

As introduced in Section 3.3.2 of the main paper, the Embodied Joint Codebook is central to our structural-centric formulation, enabling the policy to handle morphological heterogeneity. It resolves the ambiguity of our unordered, variable-length action sequence  $\mathbf{A}_t \in \mathbb{R}^{D_a \times T}$  by providing a unique, learnable embedding for each joint. Table 3 provides the mapping used in our experiments.

### 2. 3D Re-implementation of HPT and UniAct

To ensure a fair and rigorous comparison against our 3D-native approach, we adapt the primary 2D-based baselines, HPT [4] and UniAct [5], to accept 3D point cloud inputs. This adaptation is crucial as these models, in their original form, cannot process the 3D observation space used by SAT. Results are presented in Table 1.

#### 2.1. 3D-HPT

The HPT [4] framework is designed with a modality-specific “stem” and a shared “trunk” transformer. The original model employs 2D vision stems to process image-based inputs. For our 3D baseline (referred to as 3D-HPT), we replace the original 2D vision stem with a 3D-specific stem. This new stem is architected similarly to our own observation tokenizer (Section 3.3.1), utilizing a hierarchical PointNet-based encoder. It processes the raw point cloud  $\mathcal{P}_t$  by performing Farthest Point Sampling (FPS) and K-Nearest Neighbor (KNN) grouping to extract local geometric tokens, along with a global scene token. These 3D tokens are then projected to the required embedding dimension and fed into the original, unchanged HPT trunk. This modification allows HPT to leverage 3D geometric information while maintaining the integrity of its core architecture.

#### 2.2. 3D-UniAct

The adaptation of UniAct [5] requires a different approach, as its architecture is deeply integrated with a Vision-Language Model (VLM). The core VLM-based component, which processes sequences of discretized tokens, is left unmodified. Our intervention focuses on the visual tokenizer and re-encoding stages. The original UniAct feeds visual tokens, generated by a 2D tokenizer, into the VLM. Crucially, it also re-introduces raw visual features at later stages to ground the policy’s output. We replace this second, “in-the-loop” 2D feature encoder with a 3D PointNet encoder. This 3D encoder takes the raw point cloud  $\mathcal{P}_t$  as input at each relevant time step, processes it, and provides the necessary 3D-grounded visual conditioning to the policy decoder.

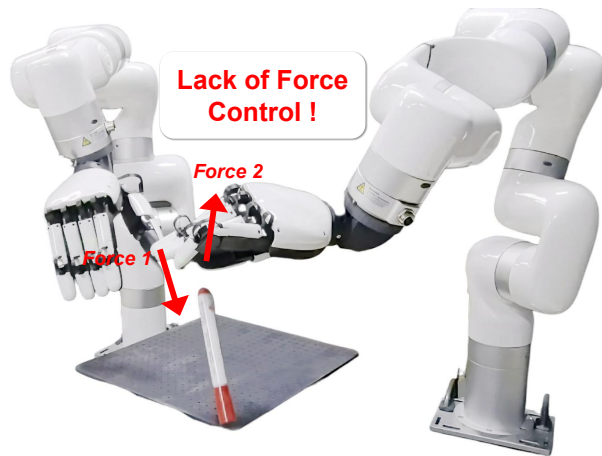

Figure 1. Failure case analysis.

This allows the model to operate on 3D data while retaining its original reasoning and action-generation mechanism.

### 3. Visualization of Failure Cases

While our Structural Action Transformer (SAT) demonstrates robust performance, it is not without limitations, particularly in scenarios involving complex contact dynamics. Figure 1 illustrates representative failure case from our real-world experiments. Our policy is not conditioned on haptic or force-torque information. This becomes a critical bottleneck in tasks requiring precise force modulation. For example, in the “Remove the pen cap” task, the policy might successfully grasp the cap but fail to apply sufficient axial force to overcome the friction, resulting in the fingers slipping. These failures highlight a key avenue for future work: integrating tactile and force-sensing modalities with our structural-centric action representation.

### 4. Ablation on Action Horizon Length

In the main paper (Sec 4.3), we demonstrate that our Structural Action Transformer (SAT) is robust to the compression of the temporal trajectory, *i.e.*, projecting the  $T$ -dimensional feature vector to a lower-dimensional embedding  $d_{feat}$ . Here, we provide a complementary ablation study on the original action horizon length  $T$  itself.

We pre-train and fine-tune our SAT model with varying horizon lengths  $T$ , keeping other parameters consistent with our best model from the main paper. The average success rate on Adroit [3] is reported in Table 2. We observe that increasing the horizon shows a marginal decrease. The addi-

| Method            | Modality | Adroit (3) [3]                  | DexArt (4) [1]                  | Bi-DexHands (4) [2]             | Average Success                 |
|-------------------|----------|---------------------------------|---------------------------------|---------------------------------|---------------------------------|
| 3D-HPT [4]        | 3D       | 0.50 $\pm$ 0.02                 | 0.55 $\pm$ 0.05                 | 0.49 $\pm$ 0.04                 | 0.51 $\pm$ 0.04                 |
| 3D-UniAct [5]     | 3D       | 0.50 $\pm$ 0.01                 | 0.55 $\pm$ 0.03                 | 0.49 $\pm$ 0.07                 | 0.51 $\pm$ 0.05                 |
| <b>SAT (Ours)</b> | 3D       | <b>0.75<math>\pm</math>0.02</b> | <b>0.73<math>\pm</math>0.03</b> | <b>0.67<math>\pm</math>0.05</b> | <b>0.71<math>\pm</math>0.04</b> |

Table 1. Quantitative comparison of our method against 3D re-implementation of HPT [4] and UniAct [5] on 11 dexterous manipulation tasks from the Adroit [3], DexArt [1], and Bi-DexHands [2] simulation benchmarks.

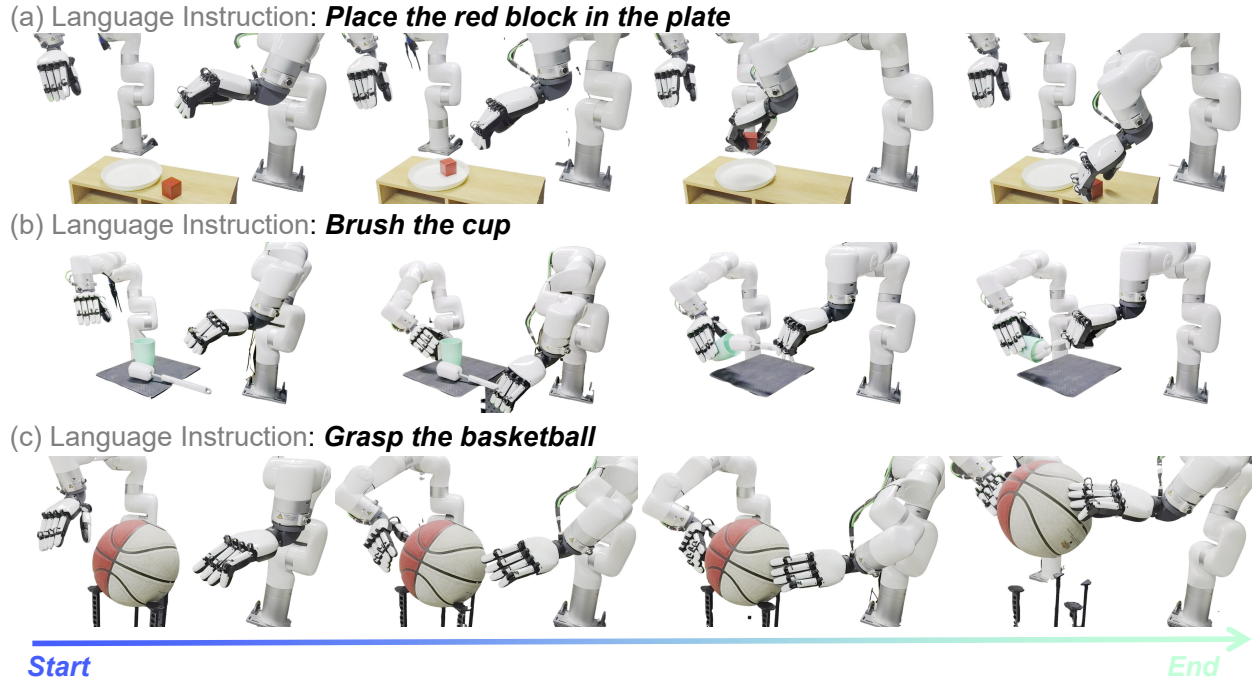

Figure 2. Qualitative rollouts of real-world tasks.

| Horizon Length $T$ | Average Success on Adroit (3)   |
|--------------------|---------------------------------|
| 8                  | 0.51 $\pm$ 0.03                 |
| 16                 | <b>0.54<math>\pm</math>0.02</b> |
| 32                 | 0.47 $\pm$ 0.03                 |
| 64                 | 0.43 $\pm$ 0.04                 |

Table 2. Ablation on action horizon length  $T$ .

tional temporal steps appear to introduce redundancy rather than new, useful long-term information. This result validates our structural-centric approach and its inherent capacity for temporal compression. It justifies that appropriate  $T$  provides a rich enough signal for compression without incurring the cost of processing unnecessary, redundant data.

#### 4.1. Additional Qualitative Results

We provide additional qualitative rollouts for the real-world tasks that could not be included in the main paper due to

space constraints. Figure 2 shows rollouts for the ‘Brush the cup’, ‘Grasp basketball’, and ‘Place block in plate’ real-world tasks. These visualizations highlight the policy’s ability to handle complex bimanual coordination and contact-rich interactions, successfully transferring the priors learned from simulation and human data to our real-world setup.

## 5. Real-World Demonstration Video

We have included a supplementary video file that shows our real-world experiments. The video demonstrates the performance of our SAT policy on the bimanual setup for tasks described in the main paper.

## References

- [1] Chen Bao, Helin Xu, Yuzhe Qin, and Xiaolong Wang. Dexart: Benchmarking generalizable dexterous manipulation with articulated objects. In *Proceedings of the IEEE/CVF Conference on Computer Vision and Pattern Recognition (CVPR)*, pages 21190–21200, 2023. 2

Table 3. Embodied Joint Codebook mapping for manipulators used in pre-training and evaluation. The indices for Functional Category and Rotation Axis are shared across all embodiments, forming the basis for cross-embodiment skill transfer. (To be continued ...)

| Embodiment            | Joint Name | Embodiment ID ( $e$ ) | Functional Category ( $f$ ) | Rotation Axis ( $r$ )   |
|-----------------------|------------|-----------------------|-----------------------------|-------------------------|
| Shadow Dexterous Hand | T-CMC      | 1                     | 1 (CMC)                     | 1 (Flexion/Extension)   |
|                       | T-CMC      | 1                     | 1 (CMC)                     | 2 (Abduction/Adduction) |
|                       | T-CMC      | 1                     | 1 (CMC)                     | 3 (Rotation)            |
|                       | T-MCP      | 1                     | 2 (MCP)                     | 1 (Flexion/Extension)   |
|                       | T-IP       | 1                     | 3 (PIP)                     | 1 (Flexion/Extension)   |
|                       | IF-CMC     | 1                     | 1 (CMC)                     | 1 (Flexion/Extension)   |
|                       | IF-CMC     | 1                     | 1 (CMC)                     | 2 (Abduction/Adduction) |
|                       | IF-CMC     | 1                     | 1 (CMC)                     | 3 (Rotation)            |
|                       | IF-MCP     | 1                     | 2 (MCP)                     | 1 (Flexion/Extension)   |
|                       | IF-MCP     | 1                     | 2 (MCP)                     | 2 (Abduction/Adduction) |
|                       | IF-MCP     | 1                     | 2 (MCP)                     | 3 (Rotation)            |
|                       | IF-PIP     | 1                     | 3 (PIP)                     | 1 (Flexion/Extension)   |
|                       | IF-DIP     | 1                     | 4 (DIP)                     | 1 (Flexion/Extension)   |
|                       | MF-CMC     | 1                     | 1 (CMC)                     | 1 (Flexion/Extension)   |
|                       | MF-CMC     | 1                     | 1 (CMC)                     | 2 (Abduction/Adduction) |
|                       | MF-CMC     | 1                     | 1 (CMC)                     | 3 (Rotation)            |
|                       | MF-MCP     | 1                     | 2 (MCP)                     | 1 (Flexion/Extension)   |
|                       | MF-MCP     | 1                     | 2 (MCP)                     | 2 (Abduction/Adduction) |
|                       | MF-MCP     | 1                     | 2 (MCP)                     | 3 (Rotation)            |
|                       | MF-PIP     | 1                     | 3 (PIP)                     | 1 (Flexion/Extension)   |
|                       | MF-DIP     | 1                     | 4 (DIP)                     | 1 (Flexion/Extension)   |
|                       | RF-CMC     | 1                     | 1 (CMC)                     | 1 (Flexion/Extension)   |
|                       | RF-CMC     | 1                     | 1 (CMC)                     | 2 (Abduction/Adduction) |
|                       | RF-CMC     | 1                     | 1 (CMC)                     | 3 (Rotation)            |
|                       | RF-MCP     | 1                     | 2 (MCP)                     | 1 (Flexion/Extension)   |

- [2] Yuanpei Chen, Yiran Geng, Fangwei Zhong, Jiaming Ji, Jiechuang Jiang, Zongqing Lu, Hao Dong, and Yaodong Yang. Bi-dexhands: Towards human-level bimanual dexterous manipulation. *IEEE Transactions on Pattern Analysis and Machine Intelligence*, 46(5):2804–2818, 2023. 2
- [3] Aravind Rajeswaran, Vikash Kumar, Abhishek Gupta, Giulia Vezzani, John Schulman, Emanuel Todorov, and Sergey Levine. Learning complex dexterous manipulation with deep reinforcement learning and demonstrations. *arXiv preprint arXiv:1709.10087*, 2017. 1, 2
- [4] Lirui Wang, Xinlei Chen, Jialiang Zhao, and Kaiming He. Scaling proprioceptive-visual learning with heterogeneous pre-trained transformers. *Proceedings of the Advances in Neural Information Processing Systems (NeurIPS)*, 37:124420–124450, 2024. 1, 2
- [5] Jinliang Zheng, Jianxiong Li, Dongxiu Liu, Yinan Zheng, Zhihao Wang, Zhonghong Ou, Yu Liu, Jingjing Liu, Yaqin Zhang, and Xianyuan Zhan. Universal actions for enhanced embodied foundation models. In *Proceedings of the IEEE/CVF Conference on Computer Vision and Pattern Recognition (CVPR)*, pages 22508–22519, 2025. 1, 2

Table 3. Embodied Joint Codebook mapping... (Continued)

| Embodiment                         | Joint Name | Embodiment ID ( $e$ ) | Functional Category ( $f$ ) | Rotation Axis ( $r$ )   |
|------------------------------------|------------|-----------------------|-----------------------------|-------------------------|
| <b>Shadow Dexterous Hand</b>       | RF-MCP     | 1                     | 2 (MCP)                     | 2 (Abduction/Adduction) |
|                                    | RF-MCP     | 1                     | 2 (MCP)                     | 3 (Rotation)            |
|                                    | RF-PIP     | 1                     | 3 (PIP)                     | 1 (Flexion/Extension)   |
|                                    | RF-DIP     | 1                     | 4 (DIP)                     | 1 (Flexion/Extension)   |
|                                    | LF-CMC     | 1                     | 1 (CMC)                     | 1 (Flexion/Extension)   |
|                                    | LF-CMC     | 1                     | 1 (CMC)                     | 2 (Abduction/Adduction) |
|                                    | LF-CMC     | 1                     | 1 (CMC)                     | 3 (Rotation)            |
|                                    | LF-MCP     | 1                     | 2 (MCP)                     | 1 (Flexion/Extension)   |
|                                    | LF-MCP     | 1                     | 2 (MCP)                     | 2 (Abduction/Adduction) |
|                                    | LF-MCP     | 1                     | 2 (MCP)                     | 3 (Rotation)            |
|                                    | LF-PIP     | 1                     | 3 (PIP)                     | 1 (Flexion/Extension)   |
|                                    | LF-DIP     | 1                     | 4 (DIP)                     | 1 (Flexion/Extension)   |
| <b>SCHUNK SVH Five-Finger Hand</b> | T-CMC      | 3                     | 1 (CMC)                     | 1 (Flexion/Extension)   |
|                                    | T-CMC      | 3                     | 1 (CMC)                     | 2 (Abduction/Adduction) |
|                                    | T-MCP      | 3                     | 2 (MCP)                     | 1 (Flexion/Extension)   |
|                                    | T-IP       | 3                     | 3 (PIP)                     | 1 (Flexion/Extension)   |
|                                    | IF-MCP     | 3                     | 2 (MCP)                     | 1 (Flexion/Extension)   |
|                                    | IF-MCP     | 3                     | 2 (MCP)                     | 2 (Abduction/Adduction) |
|                                    | IF-PIP     | 3                     | 3 (PIP)                     | 1 (Flexion/Extension)   |
|                                    | MF-MCP     | 3                     | 2 (MCP)                     | 1 (Flexion/Extension)   |
|                                    | MF-MCP     | 3                     | 2 (MCP)                     | 2 (Abduction/Adduction) |
|                                    | MF-PIP     | 3                     | 3 (PIP)                     | 1 (Flexion/Extension)   |
|                                    | RF-MCP     | 3                     | 2 (MCP)                     | 1 (Flexion/Extension)   |
|                                    | RF-MCP     | 3                     | 2 (MCP)                     | 2 (Abduction/Adduction) |
|                                    | RF-PIP     | 3                     | 3 (PIP)                     | 1 (Flexion/Extension)   |
|                                    | LF-MCP     | 3                     | 2 (MCP)                     | 1 (Flexion/Extension)   |
|                                    | LF-MCP     | 3                     | 2 (MCP)                     | 2 (Abduction/Adduction) |
|                                    | LF-PIP     | 3                     | 3 (PIP)                     | 1 (Flexion/Extension)   |
| <b>Tesla Optimus Gen 2 Hand</b>    | T-CMC      | 4                     | 1 (CMC)                     | 1 (Flexion/Extension)   |
|                                    | T-CMC      | 4                     | 1 (CMC)                     | 2 (Abduction/Adduction) |
|                                    | T-MCP      | 4                     | 2 (MCP)                     | 1 (Flexion/Extension)   |
|                                    | IF-MCP     | 4                     | 2 (MCP)                     | 1 (Flexion/Extension)   |
|                                    | IF-PIP     | 4                     | 3 (PIP)                     | 1 (Flexion/Extension)   |
|                                    | MF-MCP     | 4                     | 2 (MCP)                     | 1 (Flexion/Extension)   |
|                                    | MF-PIP     | 4                     | 3 (PIP)                     | 1 (Flexion/Extension)   |
|                                    | RF-MCP     | 4                     | 2 (MCP)                     | 1 (Flexion/Extension)   |
|                                    | RF-PIP     | 4                     | 3 (PIP)                     | 1 (Flexion/Extension)   |
|                                    | LF-MCP     | 4                     | 2 (MCP)                     | 1 (Flexion/Extension)   |
|                                    | LF-PIP     | 4                     | 3 (PIP)                     | 1 (Flexion/Extension)   |
| <b>Robotiq</b>                     | IF-MCP     | 5                     | 2 (MCP)                     | 1 (Flexion/Extension)   |
|                                    | IF-PIP     | 5                     | 3 (PIP)                     | 1 (Flexion/Extension)   |
|                                    | MF-MCP     | 5                     | 2 (MCP)                     | 1 (Flexion/Extension)   |
|                                    | MF-PIP     | 5                     | 3 (PIP)                     | 1 (Flexion/Extension)   |
|                                    | LF-MCP     | 5                     | 2 (MCP)                     | 1 (Flexion/Extension)   |
|                                    | LF-PIP     | 5                     | 3 (PIP)                     | 1 (Flexion/Extension)   |

Table 3. Embodied Joint Codebook mapping... (Continued)

| Embodiment            | Joint Name | Embodiment ID ( $e$ ) | Functional Category ( $f$ ) | Rotation Axis ( $r$ )   |
|-----------------------|------------|-----------------------|-----------------------------|-------------------------|
| <b>Inspire Robots</b> | T-CMC      | 6                     | 1 (CMC)                     | 1 (Flexion/Extension)   |
|                       | T-CMC      | 6                     | 1 (CMC)                     | 2 (Abduction/Adduction) |
|                       | T-MCP      | 6                     | 2 (MCP)                     | 1 (Flexion/Extension)   |
|                       | IF-MCP     | 6                     | 2 (MCP)                     | 1 (Flexion/Extension)   |
|                       | IF-PIP     | 6                     | 3 (PIP)                     | 1 (Flexion/Extension)   |
|                       | MF-MCP     | 6                     | 2 (MCP)                     | 1 (Flexion/Extension)   |
|                       | MF-PIP     | 6                     | 3 (PIP)                     | 1 (Flexion/Extension)   |
|                       | RF-MCP     | 6                     | 2 (MCP)                     | 1 (Flexion/Extension)   |
|                       | RF-PIP     | 6                     | 3 (PIP)                     | 1 (Flexion/Extension)   |
|                       | LF-MCP     | 6                     | 2 (MCP)                     | 1 (Flexion/Extension)   |
|                       | LF-PIP     | 6                     | 3 (PIP)                     | 1 (Flexion/Extension)   |
| <b>xHand</b>          | T-CMC      | 7                     | 1 (CMC)                     | 1 (Flexion/Extension)   |
|                       | T-CMC      | 7                     | 1 (CMC)                     | 2 (Abduction/Adduction) |
|                       | T-CMC      | 7                     | 1 (CMC)                     | 3 (Rotation)            |
|                       | T-MCP      | 7                     | 2 (MCP)                     | 1 (Flexion/Extension)   |
|                       | T-IP       | 7                     | 3 (PIP)                     | 1 (Flexion/Extension)   |
|                       | IF-CMC     | 7                     | 1 (CMC)                     | 1 (Flexion/Extension)   |
|                       | IF-CMC     | 7                     | 1 (CMC)                     | 2 (Abduction/Adduction) |
|                       | IF-CMC     | 7                     | 1 (CMC)                     | 3 (Rotation)            |
|                       | IF-MCP     | 7                     | 2 (MCP)                     | 1 (Flexion/Extension)   |
|                       | IF-MCP     | 7                     | 2 (MCP)                     | 2 (Abduction/Adduction) |
|                       | IF-PIP     | 7                     | 3 (PIP)                     | 1 (Flexion/Extension)   |
|                       | IF-DIP     | 7                     | 4 (DIP)                     | 1 (Flexion/Extension)   |
|                       | MF-MCP     | 7                     | 2 (MCP)                     | 1 (Flexion/Extension)   |
|                       | MF-MCP     | 7                     | 2 (MCP)                     | 2 (Abduction/Adduction) |
|                       | MF-PIP     | 7                     | 3 (PIP)                     | 1 (Flexion/Extension)   |
|                       | RF-MCP     | 7                     | 2 (MCP)                     | 1 (Flexion/Extension)   |
|                       | RF-MCP     | 7                     | 2 (MCP)                     | 2 (Abduction/Adduction) |
|                       | RF-PIP     | 7                     | 3 (PIP)                     | 1 (Flexion/Extension)   |
|                       | LF-MCP     | 7                     | 2 (MCP)                     | 1 (Flexion/Extension)   |
|                       | LF-MCP     | 7                     | 2 (MCP)                     | 2 (Abduction/Adduction) |
|                       | LF-PIP     | 7                     | 3 (PIP)                     | 1 (Flexion/Extension)   |
| <b>OYMotion</b>       | T-CMC      | 8                     | 1 (CMC)                     | 1 (Flexion/Extension)   |
|                       | T-CMC      | 8                     | 1 (CMC)                     | 2 (Abduction/Adduction) |
|                       | T-CMC      | 8                     | 1 (CMC)                     | 3 (Rotation)            |
|                       | T-MCP      | 8                     | 2 (MCP)                     | 1 (Flexion/Extension)   |
|                       | T-IP       | 8                     | 3 (PIP)                     | 1 (Flexion/Extension)   |
|                       | IF-MCP     | 8                     | 2 (MCP)                     | 1 (Flexion/Extension)   |
|                       | IF-MCP     | 8                     | 2 (MCP)                     | 2 (Abduction/Adduction) |
|                       | IF-PIP     | 8                     | 3 (PIP)                     | 1 (Flexion/Extension)   |
|                       | MF-MCP     | 8                     | 2 (MCP)                     | 1 (Flexion/Extension)   |
|                       | MF-MCP     | 8                     | 2 (MCP)                     | 2 (Abduction/Adduction) |
|                       | MF-PIP     | 8                     | 3 (PIP)                     | 1 (Flexion/Extension)   |
|                       | RF-MCP     | 8                     | 2 (MCP)                     | 1 (Flexion/Extension)   |
|                       | RF-MCP     | 8                     | 2 (MCP)                     | 2 (Abduction/Adduction) |
|                       | RF-PIP     | 8                     | 3 (PIP)                     | 1 (Flexion/Extension)   |
|                       | LF-MCP     | 8                     | 2 (MCP)                     | 1 (Flexion/Extension)   |
|                       | LF-MCP     | 8                     | 2 (MCP)                     | 2 (Abduction/Adduction) |
|                       | LF-PIP     | 8                     | 3 (PIP)                     | 1 (Flexion/Extension)   |

Table 3. Embodied Joint Codebook mapping... (Continued)

| Embodiment                 | Joint Name | Embodiment ID ( $e$ ) | Functional Category ( $f$ ) | Rotation Axis ( $r$ )   |
|----------------------------|------------|-----------------------|-----------------------------|-------------------------|
| <b>DLR Hand Arm System</b> | T-CMC      | 9                     | 1 (CMC)                     | 1 (Flexion/Extension)   |
|                            | T-CMC      | 9                     | 1 (CMC)                     | 2 (Abduction/Adduction) |
|                            | T-MCP      | 9                     | 2 (MCP)                     | 1 (Flexion/Extension)   |
|                            | T-IP       | 9                     | 3 (PIP)                     | 1 (Flexion/Extension)   |
|                            | IF-CMC     | 9                     | 1 (CMC)                     | 1 (Flexion/Extension)   |
|                            | IF-MCP     | 9                     | 2 (MCP)                     | 1 (Flexion/Extension)   |
|                            | IF-MCP     | 9                     | 2 (MCP)                     | 2 (Abduction/Adduction) |
|                            | IF-PIP     | 9                     | 3 (PIP)                     | 1 (Flexion/Extension)   |
|                            | MF-CMC     | 9                     | 1 (CMC)                     | 1 (Flexion/Extension)   |
|                            | MF-MCP     | 9                     | 2 (MCP)                     | 1 (Flexion/Extension)   |
|                            | MF-MCP     | 9                     | 2 (MCP)                     | 2 (Abduction/Adduction) |
|                            | MF-PIP     | 9                     | 3 (PIP)                     | 1 (Flexion/Extension)   |
|                            | RF-CMC     | 9                     | 1 (CMC)                     | 1 (Flexion/Extension)   |
|                            | RF-MCP     | 9                     | 2 (MCP)                     | 1 (Flexion/Extension)   |
|                            | RF-MCP     | 9                     | 2 (MCP)                     | 2 (Abduction/Adduction) |
|                            | RF-PIP     | 9                     | 3 (PIP)                     | 1 (Flexion/Extension)   |
|                            | LF-CMC     | 9                     | 1 (CMC)                     | 1 (Flexion/Extension)   |
|                            | LF-MCP     | 9                     | 2 (MCP)                     | 1 (Flexion/Extension)   |
|                            | LF-MCP     | 9                     | 2 (MCP)                     | 2 (Abduction/Adduction) |
|                            | LF-PIP     | 9                     | 3 (PIP)                     | 1 (Flexion/Extension)   |
| <b>Foxtech Robotics</b>    | T-CMC      | 10                    | 1 (CMC)                     | 1 (Flexion/Extension)   |
|                            | T-CMC      | 10                    | 1 (CMC)                     | 2 (Abduction/Adduction) |
|                            | T-MCP      | 10                    | 2 (MCP)                     | 1 (Flexion/Extension)   |
|                            | IF-MCP     | 10                    | 2 (MCP)                     | 1 (Flexion/Extension)   |
|                            | IF-PIP     | 10                    | 3 (PIP)                     | 1 (Flexion/Extension)   |
|                            | MF-MCP     | 10                    | 2 (MCP)                     | 1 (Flexion/Extension)   |
|                            | MF-PIP     | 10                    | 3 (PIP)                     | 1 (Flexion/Extension)   |
|                            | RF-MCP     | 10                    | 2 (MCP)                     | 1 (Flexion/Extension)   |
|                            | RF-PIP     | 10                    | 3 (PIP)                     | 1 (Flexion/Extension)   |
|                            | LF-MCP     | 10                    | 2 (MCP)                     | 1 (Flexion/Extension)   |
|                            | LF-PIP     | 10                    | 3 (PIP)                     | 1 (Flexion/Extension)   |
| <b>Allegro Hand</b>        | T-CMC      | 2                     | 1 (CMC)                     | 1 (Flexion/Extension)   |
|                            | T-CMC      | 2                     | 1 (CMC)                     | 2 (Abduction/Adduction) |
|                            | T-MCP      | 2                     | 2 (MCP)                     | 1 (Flexion/Extension)   |
|                            | T-IP       | 2                     | 3 (PIP)                     | 1 (Flexion/Extension)   |
|                            | IF-CMC     | 2                     | 1 (CMC)                     | 1 (Flexion/Extension)   |
|                            | IF-MCP     | 2                     | 2 (MCP)                     | 1 (Flexion/Extension)   |
|                            | IF-MCP     | 2                     | 2 (MCP)                     | 2 (Abduction/Adduction) |
|                            | IF-PIP     | 2                     | 3 (PIP)                     | 1 (Flexion/Extension)   |
|                            | IF-DIP     | 2                     | 4 (DIP)                     | 1 (Flexion/Extension)   |
|                            | MF-CMC     | 2                     | 1 (CMC)                     | 1 (Flexion/Extension)   |
|                            | MF-MCP     | 2                     | 2 (MCP)                     | 1 (Flexion/Extension)   |
|                            | MF-MCP     | 2                     | 2 (MCP)                     | 2 (Abduction/Adduction) |
|                            | MF-PIP     | 2                     | 3 (PIP)                     | 1 (Flexion/Extension)   |
|                            | MF-DIP     | 2                     | 4 (DIP)                     | 1 (Flexion/Extension)   |
|                            | RF-CMC     | 2                     | 1 (CMC)                     | 1 (Flexion/Extension)   |
|                            | RF-MCP     | 2                     | 2 (MCP)                     | 1 (Flexion/Extension)   |
|                            | RF-MCP     | 2                     | 2 (MCP)                     | 2 (Abduction/Adduction) |
|                            | RF-PIP     | 2                     | 3 (PIP)                     | 1 (Flexion/Extension)   |
|                            | RF-DIP     | 2                     | 4 (DIP)                     | 1 (Flexion/Extension)   |
